# Supplementary material for: Bile acid homeostasis controls CAR signaling pathways in mouse testis through FXRalpha
Source: Sci Rep. 2017 Feb 9;7:42182. doi: 10.1038/srep42182 (PMC5299845; doi:10.1038/srep42182)
Supplement: Supplemental Information [file srep42182-s1.pdf]

**Bile acid homeostasis controls CAR signaling pathways in mouse testis through FXRalpha.**

Emmanuelle MARTINOT<sup>1,2,3,4</sup>, Marine BAPTISSART<sup>1,2,3,4</sup>, Aurélie VEGA<sup>1,2,3,4</sup>, Lauriane SEDES<sup>1,2,3,4</sup>, Betty ROUAISNEL<sup>1,2,3,4</sup>, Fred VAZ<sup>5</sup>, Jean-Paul SARU<sup>1,2,3,4</sup>, Angélique de HAZE<sup>1,2,3,4</sup>, Silvère BARON<sup>1,2,3,4</sup>, Françoise CAIRA<sup>1,2,3,4</sup>, Claude BEAUDOIN<sup>1,2,3,4</sup> and David H. VOLLE<sup>1,2,3,4\*</sup>

<sup>1</sup>INSERM U 1103, Génétique Reproduction et Développement (GReD), F-63170 Aubière, France

<sup>2</sup>Université Clermont Auvergne, GReD, F-63000 Clermont-Ferrand, F-63170 Aubière, France

<sup>3</sup>CNRS, UMR 6293, GReD, F-63170 Aubière, France

<sup>4</sup>Centre de Recherche en Nutrition Humaine d’Auvergne, F-63000 Clermont-Ferrand, France

<sup>5</sup> Academic Medical Center, University of Amsterdam, Lab. Genetic Metabolic Diseases, F0-224, P.O. Box 22700, 1100 DE Amsterdam, The Netherlands.

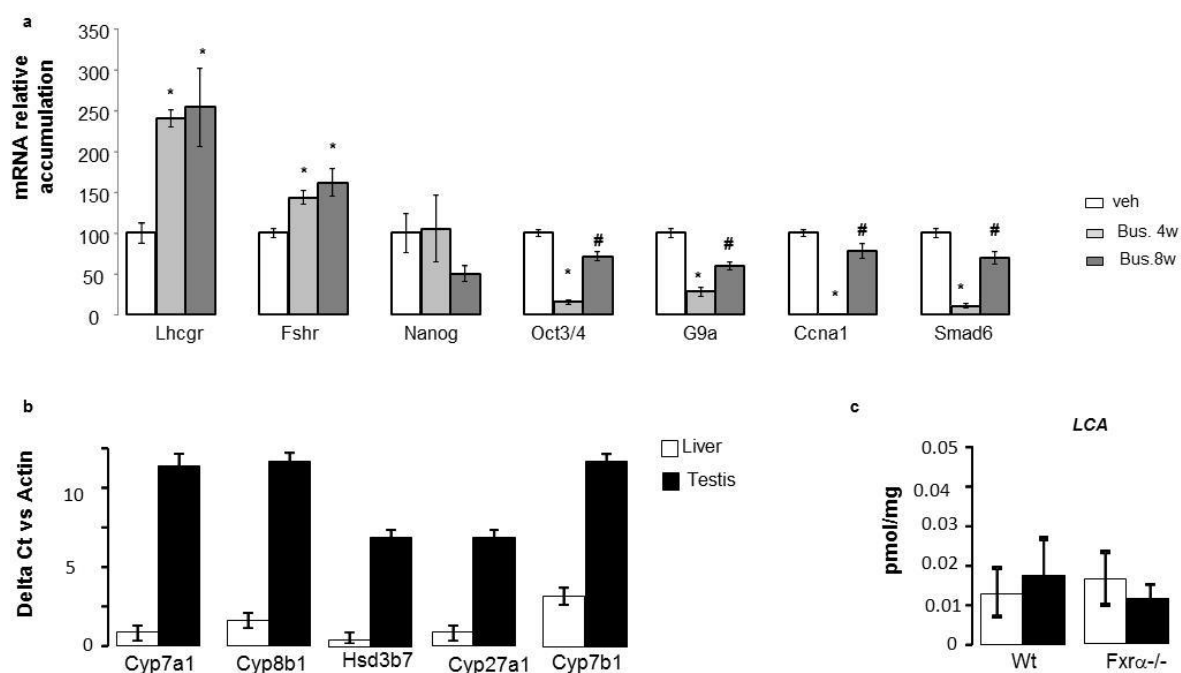

**Fig. S1. a/** Testicular mRNA accumulation of *Lcgr*, *Fshr*, *Nanog*, *Oct3/4*, *G9a*, *Ccna1* and *Smad6*, normalized to  $\beta$ -actin mRNA levels in whole testes of C57BL/6J mice treated with busulfan (20 mg/kg, one injection IP) at T0, 4, or 8 weeks (n=8 per group). \*Denotes significant difference from the T0 time point; #denotes significant difference from the 4-week time point ( $P < 0.05$ ). **b/** Analysis of the relative liver and testicular levels of *Cyp7a1*, *Cyp8b1*, *Hsd3b7*, *Cyp27a1* and *Cyp7b1*. The relative levels are represented as delta-Ct versus  $\beta$ -actin. **c/** Testicular concentration of LCA in testis of Wt and Fxr $\alpha$ <sup>-/-</sup> males fed a control or BA-diet for 2 weeks (n=5 per group).

In all panels, data are expressed as means  $\pm$  standard error of the mean. Statistical analysis: \* $P < 0.05$ .

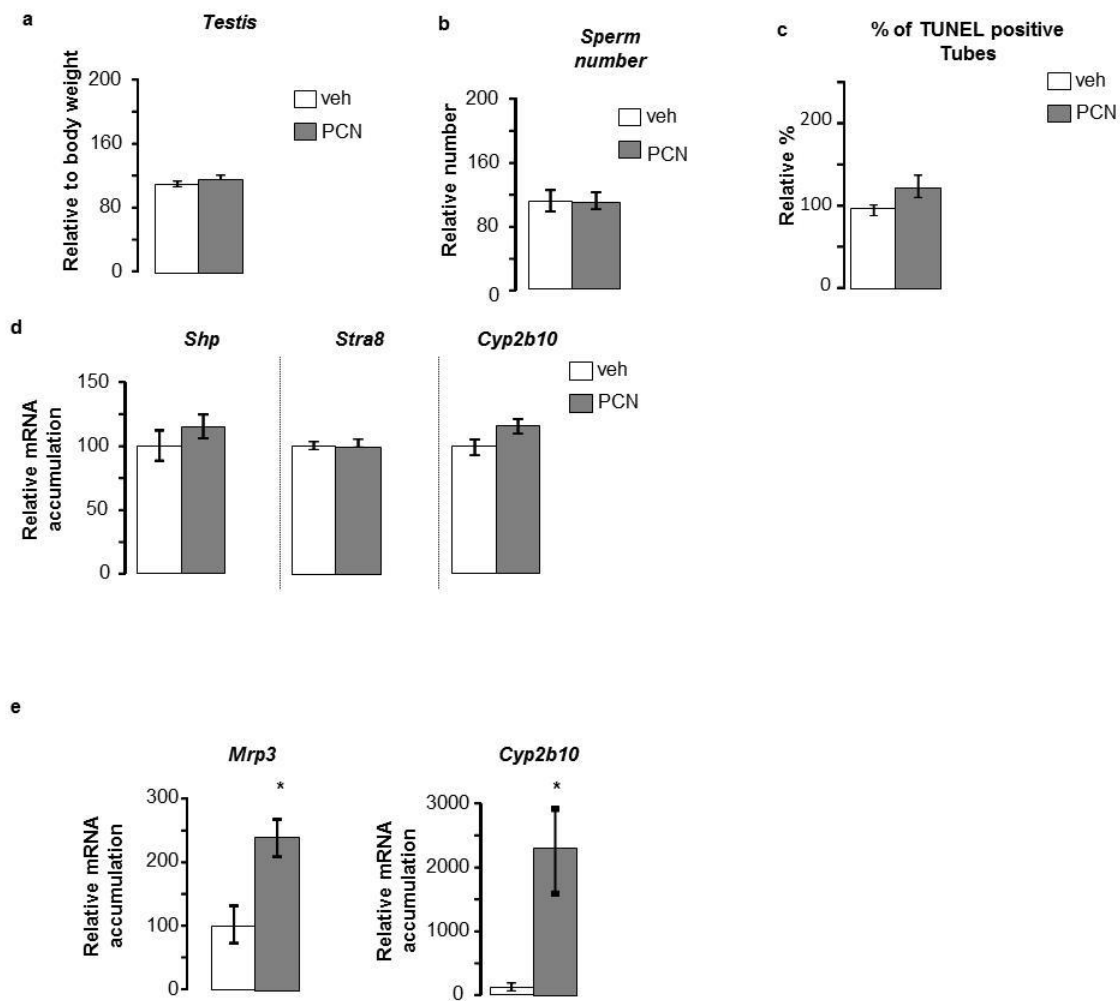

**Fig. S2.** **a/** Testis weight normalized to body weight in wild-type C57Bl6 males treated 2 weeks with PCN (50mg/kg/day) or vehicle (DMSO) (n=6 to 7 per group). **b/** Spermatozoa count in the head of the epididymis of C57Bl6 males treated 2 weeks with PCN (50mg/kg/day) or vehicle (DMSO) (n=6 to 7 per group). **c/** Quantification of TUNEL analyses in C57Bl6 males treated 2 weeks with PCN (50mg/kg/day) or vehicle (DMSO), the number of tubules with TUNEL-positive cells is indicated as the number of positive tubes per 100 seminiferous tubules (n = 6-7). **d/** Testicular mRNA accumulation of *Shp*, *Stra8* and *Cyp2b10* normalized to  $\beta$ -actin mRNA levels in C57Bl6 males treated 2 weeks with PCN (50mg/kg/day) or vehicle (DMSO). Vehicle-treated mice were arbitrarily fixed at 100% (n=6 to 7 per group). **e/** Liver mRNA accumulation of *Mrp3* and *Cyp2b10* normalized to  $\beta$ -actin mRNA levels in C57Bl6 males treated 2 weeks with PCN (50mg/kg/day) or vehicle (DMSO). Vehicle-treated mice were arbitrarily fixed at 100% (n=6 to 7 per group).

In all panels, data are expressed as means  $\pm$  standard error of the mean. Statistical analysis: \* $P < 0.05$ .

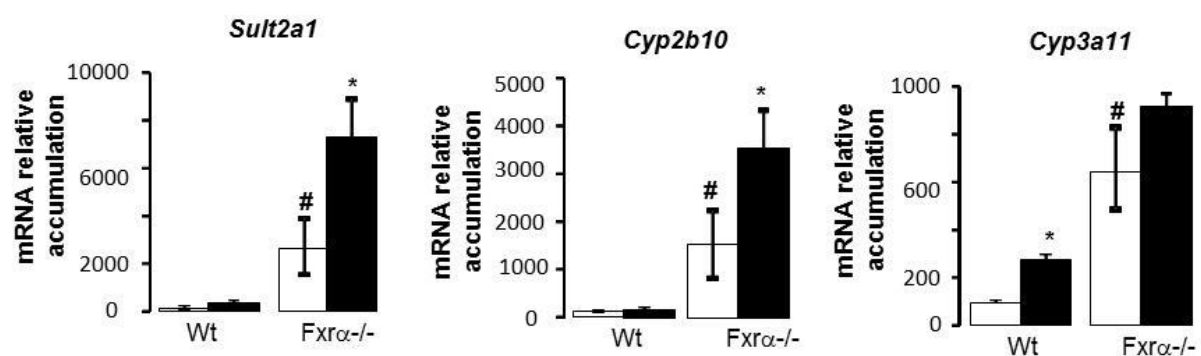

**Fig. S3.** Liver mRNA expression of *Sult2a1*, *Cyp2b10* and *Cyp3a11* normalized to  $\beta$ -actin mRNA levels in wild-type and *Fxrα*<sup>-/-</sup> adult mice fed a control or BA-diet (n=6 -10 per group).

Data are expressed as means  $\pm$  standard error of the mean. Statistical analysis: \* $P < 0.05$ .

**Table S1**

|               |            |                          |
|---------------|------------|--------------------------|
| <b>PLZF</b>   | <b>FW</b>  | ACACAGACAGACCCATACTGG    |
|               | <b>REV</b> | TCACCTGTATGTGAGCGAAGG    |
| <b>HSD3B7</b> | <b>FW</b>  | ACCTGCACCTGAGTTCTTGG     |
|               | <b>REV</b> | CAATCACATTCTGTGTGCCC     |
| <b>AACS</b>   | <b>FW</b>  | GTGGTGCTGATCCCCTATGT     |
|               | <b>REV</b> | CTTGCCAGGAAATCATCCAG     |
| <b>TPN1</b>   | <b>FW</b>  | ACCAGCCGCAAGCTAAAGACTCAT |
|               | <b>REV</b> | TCAGACTGGCATTACCCACTCT   |
| <b>TSX</b>    | <b>FW</b>  | ATGATGACACCGACGATCAGG    |
|               | <b>REV</b> | TCGGTACTGCTGACTCTGTCC    |
